# Supplementary material for: Low temperature synthesis of rutile TiO2single crystal nanorods with exposed (002) facets and their decoration with gold nanoparticles for photocatalytic applications
Source: Royal Society of Chemistry journal article supplement (doi:10.1039/c5ra04802h), 2015-01-01
Supplement: c5ra04802h1.pdf [file c5ra04802h1.pdf]

*Supporting information for*

**Low temperature synthesis of rutile TiO<sub>2</sub> single-crystal nanorods with exposed (002) facets and its decoration of gold nanoparticles for photocatalytic application**

Lijuan Bu,<sup>a</sup> Wenjing Yang<sup>c</sup> and Hai Ming<sup>b\*</sup>

<sup>a</sup>Key Laboratory of Chemical Biology and Traditional Chinese Medicine Research (Ministry of Education), College of Chemistry and Chemical Engineering, Hunan Normal University, Changsha 410081, P. R. China.

<sup>b</sup>College of Chemistry, Chemical Engineering and Materials Science, Soochow University, Suzhou 215123, P. R. China; E-mail: lunaticmh@163.com.

<sup>c</sup>Reliability Research and Analysis Center, CEPREI (East China) Laboratories, The Fifth Research Institute of MIIT East China, P. R. China.

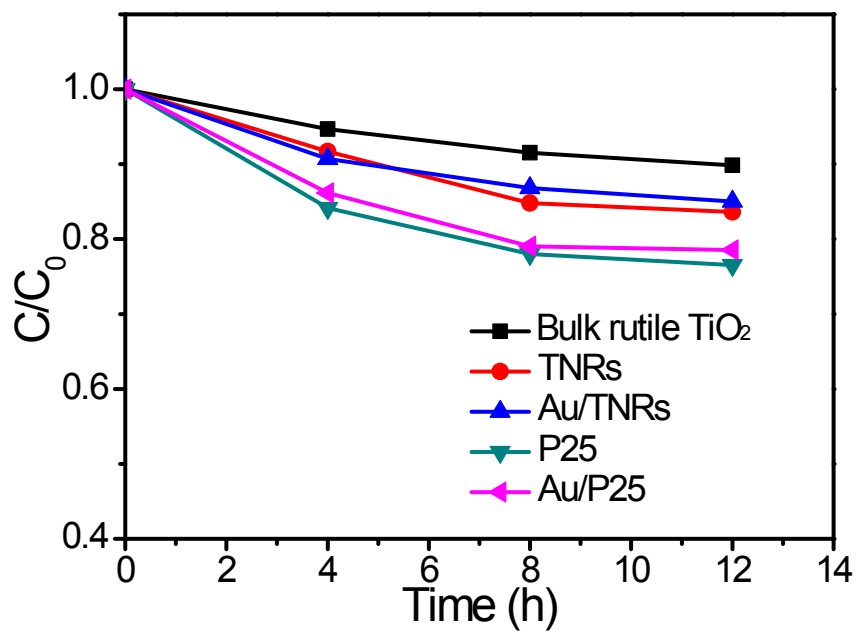

**Fig. S1** The absorption plots of RhB on the different photocatalysts under the dark condition, and  $C_0$  is the pristine concentration (10 ppm).

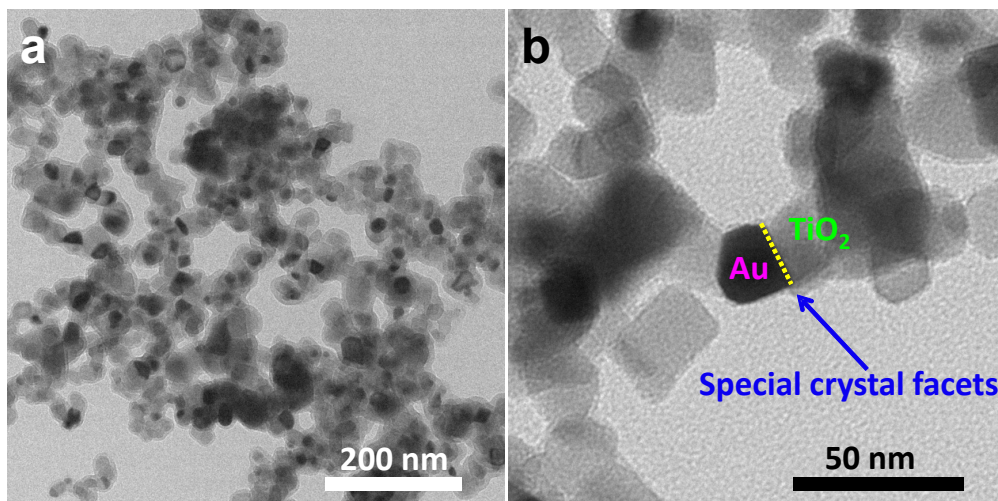

**Fig. S2** (a) and (b) TEM images of Au/P25 with different magnification.

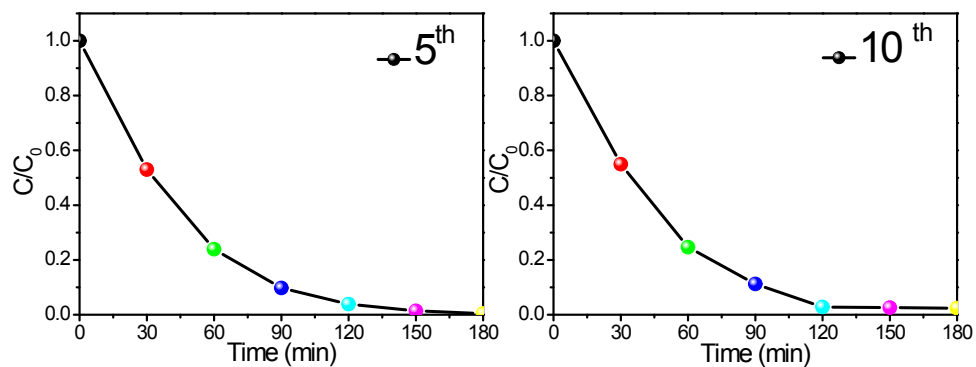

**Fig. S3** Reaction time dependence of the relative concentration of the RhB in solution over Au/TNRs during repeated photodecomposition experiments, and  $C_0$  is the relative concentration of the RhB in solution after balancing absorption.

**Table S1.** A list of Au/TiO<sub>2</sub> and Au/P25 catalysts applied in variable catalytic reactions and their reported optimal Au size and its effects on the reactions.

| Kind of Catalyst                                                        | Kind of light<br>driven | Particle Size<br>of Au | Kind of reaction                                  | Optimal Au<br>Size | Simple Reason                         |
|-------------------------------------------------------------------------|-------------------------|------------------------|---------------------------------------------------|--------------------|---------------------------------------|
| Au/TiO <sub>2</sub> (A or R) <sup>[S1]</sup>                            | UV                      | 3-30 nm                | Ethanol→H <sub>2</sub>                            | 3-12 nm            | Electron-hole<br>separation           |
| Au/TiO <sub>2</sub> <sup>[S2]</sup>                                     | UV                      | 2-10 nm                | CO oxidation                                      | Beyond 2<br>nm     | Interface, coordinate<br>sites        |
| Au/P25 <sup>[S3]</sup>                                                  | UV                      | 2-25 nm                | Degradation of MO                                 | 2-5 nm             | Size-dependent                        |
| Au/TiO <sub>2</sub> (A) <sup>[S4]</sup>                                 | UV                      | 2-4 nm                 | Degradation of MO                                 | 2.5 nm             | Synergetic action                     |
| Au/TiO <sub>2</sub> (AR) and<br>Au/TiO <sub>2</sub> (A) <sup>[S5]</sup> | UV and Vis              | --                     | Acetone degradation                               | 5.3 and 7.7 nm     | Light harvester,<br>Charge injection  |
| Au/P25 <sup>[S6]</sup>                                                  | Vis                     | 9.5–3.5 nm             | Degradation of<br>Salicylic acid                  | 3.5 nm             | Surface to volume<br>ratio, interface |
| Au/P25 <sup>[S7]</sup>                                                  | UV-Vis                  | 1.8 to 3.0 nm          | Degradation of MO                                 | 2.5 nm             | Fermi energy                          |
| Au/TiO <sub>2</sub> (A) <sup>[S8]</sup>                                 | UV-Vis                  | 5-100nm                | Phenol degradation                                | 5 nm               | Charge separation                     |
| Au/P25 <sup>[S9]</sup>                                                  | UV-Vis                  | 6.1-7.6 nm             | Degradation of MO                                 | 6.1 nm             | Coupled effect                        |
| Au/P25 <sup>[S10]</sup>                                                 | --                      | 5 nm                   | CO oxidation                                      | 5 nm               | Plasma                                |
| TiO <sub>2</sub> /Au <sup>[S11]</sup>                                   | Vis                     | 3-8 nm                 | Photocurrent                                      | 3 nm               | Fermi level                           |
| Au/TiO <sub>2</sub> (A) <sup>[S12]</sup>                                | Vis                     | 20-90 nm               | Degradation of MB<br>and H <sub>2</sub> evolution | 20-90 nm           | Surface plasmon<br>resonance          |

Note: A, R, MB, and MO are abbreviation of Anatase, Rutile, methyl blue and methyl orange respectively.

## References

- S1. M. Murdoch, G. I. N. Waterhouse, M. A. Nadeem, J. B. Metson, M. A. Keane, R. F. Howe, J. Llorca and H. Idriss, *Nature Chemistry*, 2011, **3**, 489-492.
- S2. H. Overbury, V. Schwartz, D. R. Mullins, W. Yan and S. Dai, *Journal of Catalysis*, 2006, **241**, 56-65.
- S3. M. M. Khan, S. Kalathil, J. Lee and M. H. Cho, *Bull. Korean Chem. Soc.*, 2012, **33**, 1753.
- S4. J. Li and H. C. Zeng, *Chem. Mater.*, 2006, **18**, 4270-4277.
- S5. B. Cojocaru, Ş. Neaţu, E. Sacaliuc-Pârvulescu, F. Lévy, V. I. Pârvulescu and H. Garci, *Applied Catalysis B: Environmental*, 2011, **107**, 140-149.
- S6. R. Kaur and B. Pal, *Journal of Molecular Catalysis A: Chemical*, 2012, **355**, 39-43.
- S7. B. Z. Tian, J. L. Zhang, T. Z. Tong and F. Chen, *Applied Catalysis B: Environmental*, 2008, **79**, 394-401.
- S8. M. C. Hidalgo, J. J. Murcia, J. A. Navío and G. Colón, *Applied Catalysis A: General*, 2011, **397**, 112-120.
- S9. S. Oros-Ruiz, R. Gómez, R. López, A. Hernández-Gordillo, J. A. Pedraza-Avella, E. Moctezuma and E. Pérez, *Catalysis Communications*, 2012, **21**, 72-76.
- S10. H.-Y. Fan, C. Shi, X.-S. Li, S. Zhang, J.-L. Liu and A.-M. Zhu, *Applied Catalysis B: Environmental*, 2012, **119-120**, 49-55.
- S11. V. Subramanian, E. E. Wolf and P. V. Kamat, *J. Am. Chem. Soc.*, 2004, **126**, 4943-4950.
- S12. Z. F. Bian, T. Tachikawa, P. Zhang, M. Fujitsuka and T. Majima, *J. Am. Chem. Soc.*, 2014, **136**, 458-465.
